# Supplementary material for: CabHLH79 Acts Upstream of CaNAC035 to Regulate Cold Stress in Pepper
Source: MDPI journal article supplement (doi:10.3390/ijms23052537), 2022-02-25
Supplement: s1 [file s1]

## Supplementary materials

**A**

|                               | <b>Basic Helix Loop Helix Domain</b>                          |     |
|-------------------------------|---------------------------------------------------------------|-----|
| CabHLH79                      | A. <u>NKGTEQSSKE</u> .EPPK.DYIHVRARRGQATDSHSLAERARREKISEEMK   | 177 |
| AT5G62610.1 NP_001330306      | GGSKATEQCKNKE.EPPK.DYIHVRARRGQATDSHSLAERARREKISEEMT           | 180 |
| StubHLH79-like XP_006344980.1 | A. <u>NKGTEQSSKE</u> .EPPK.DYIHVRARRGQATDSHSLAERARREKISEEMK   | 191 |
| SlybHLH089 XP_004236164.1     | A. <u>NKGTEQSSKE</u> .EPPK.DYIHVRARRGQATDSHSLAERARREKISEEMK   | 192 |
| NabHLH79-like XP_019243650.1  | V. <u>NKGTEQSSKE</u> .EPPK.DYIHVRARRGQATDSHSLAERARREKISEEMK   | 183 |
| CsibHLH79 XP_006476705.1      | G. <u>NKPPE</u> .SSKFESEPPK.DYIHVRARRGQATDSHSLAERARREKISEEMK  | 174 |
| ZjbHLH79 XP_015882712.1       | D. <u>NKPPE</u> .SSKFESEPPK.DYIHVRARRGQATDSHSLAERARREKISEEMK  | 182 |
| JrbHLH79-like XP_018831619.1  | G. <u>NKSTESTKE</u> SEPPK.DYIHVRARRGQATDSHSLAERARREKISEEMK    | 177 |
| CsbHLH79 XP_004138140.1       | G. <u>NKLAPEQSPKE</u> .EPPK.DYIHVRARRGQATDSHSLAERARREKISEEMK  | 174 |
| Consensus                     | nk tegsskp eppk dyihvrarrgqatdshslaerarreki <del>ser</del> mk |     |
|                               | H ER RR I R                                                   |     |
| CabHLH79                      | ILQDLVPGCNKVIKALVLDEIINYIQSLQRCVEFLSMKLEAVNSRMNHP             | 227 |
| AT5G62610.1 NP_001330306      | ALQDLVPGCNKVIKALVLDEIINYIQSLQRCVEFLSMKLEAVNSRGASTG            | 230 |
| StubHLH79-like XP_006344980.1 | ILQDLVPGCNKVIKALVLDEIINYIQSLQRCVEFLSMKLEAVNSRMNHP             | 241 |
| SlybHLH089 XP_004236164.1     | ILQDLVPGCNKVIKALVLDEIINYIQSLQRCVEFLSMKLEAVNSRMNHP             | 242 |
| NabHLH79-like XP_019243650.1  | ILQDLVPGCNKVIKALVLDEIINYIQSLQRCVEFLSMKLEAVNSRMNHP             | 233 |
| CsibHLH79 XP_006476705.1      | ILQDLVPGCNKVIKALVLDEIINYIQSLQRCVEFLSMKLEAVNSRMNLT             | 224 |
| ZjbHLH79 XP_015882712.1       | ILQDLVPGCNKVIKALVLDEIINYIQSLQRCVEFLSMKLEAVNSRMNIN             | 232 |
| JrbHLH79-like XP_018831619.1  | ILQDLVPGCNKVIKALVLDEIINYIQSLQRCVEFLSMKLEAVNSRMGMN             | 227 |
| CsbHLH79 XP_004138140.1       | ILQDLVPGCNKVIKALVLDEIINYIQSLQRCVEFLSMKLEAVNSRMNIT             | 224 |
| Consensus                     | ilgdlvpgcnkvigkalvldeiinyiqslrqv <del>efl</del> smkleavnsrmn  |     |
|                               | L LVP K D AS L EA                                             |     |

**B**

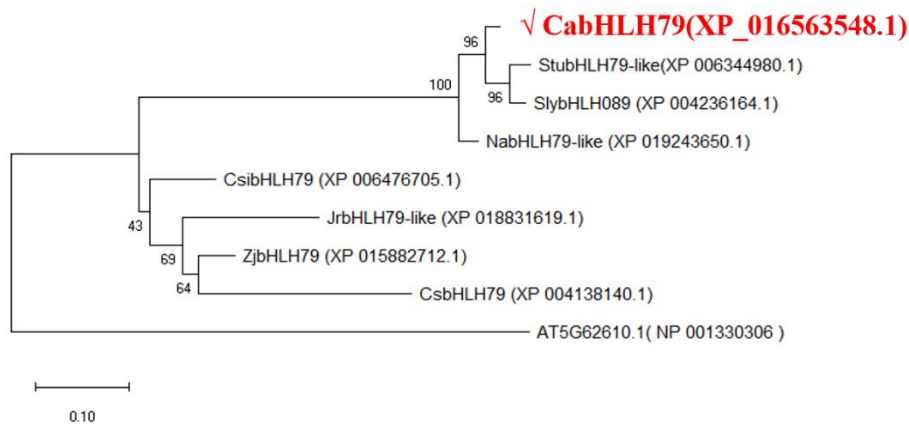

**Figure S1.** Sequence analysis of the CabHLH79 protein. **(A)** The sequence analysis of *CabHLH79*. The black areas represent homology level 100 %. The pink areas represent a level of homology greater than or equal to 75 %. The blue areas represent a level of homology greater than or equal to 50 %. The consensus subdomains in the bHLH binding domain are shown by thin underlines. **(B)** Phylogenetic relationship of *CabHLH79*(XP\_016563548.1) and bHLH from other plant species. The protein sequence of CabHLH79 was used to perform the BLASTP search in the database NCBI Protein Reference Sequences (<https://blast.ncbi.nlm.nih.gov/>). Eight bHLH proteins were selected to construct the NJ phylogenetic tree by MEGA-X (<http://www.megasoftware.net/>) with the following parameters: JTT matrix-based model, bootstrap (1000 replicates), and pairwise deletion gaps.

**A**

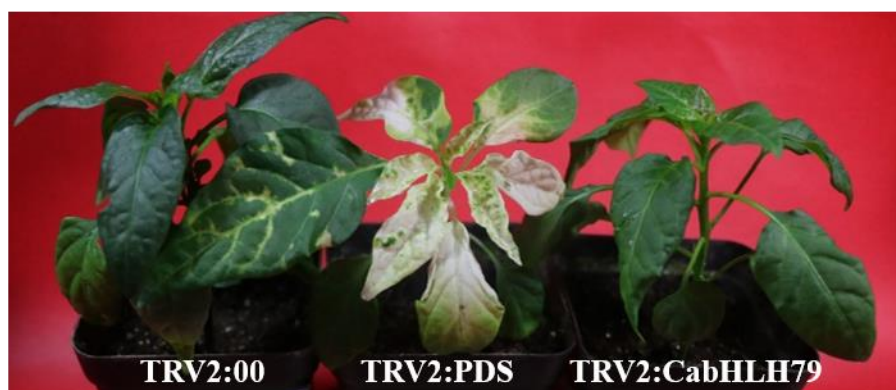

**B**

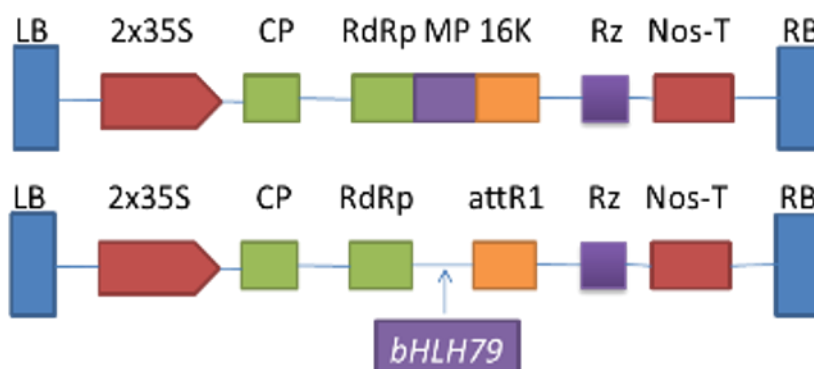

**Figure S2.** Phenotypes of plants with reduced expression of *CabHLH79*. **(A)** Phenotypes of pepper plants with reduced expression (about 4 weeks after injection). **(B)** Schematic diagram of the construction of VIGS vector. The experiment was conducted with three biological replicates and each replicate contained 3–5 pepper seedlings.

**Table S1.** Primers were used for the RT- qPCR.

| Gene name | Primer Abbreviation | Primer Sequence (5'–3') |
|-----------|---------------------|-------------------------|
| 1         | <i>CaUbi3-F</i>     | TGTCCATCTGCTCTCTGTTG    |
| 2         | <i>CaUbi3-R</i>     | CACCCCAAGCACAATAAGAC    |
| 3         | <i>CabHLH79-F</i>   | CCAGCAGCTGTGTTCCACTA    |
| 4         | <i>CabHLH79-R</i>   | ACGAGACGACCATGAACATACA  |
| 5         | <i>CaSOD-F</i>      | TATGGAGCCTTAGAACCTGC    |
| 6         | <i>CaSOD-R</i>      | CCATTGAACTTGATAGCACCT   |
| 7         | <i>CaPOD-F</i>      | TCCTCCTCCTACTTCTAACC    |
| 8         | <i>CaPOD-R</i>      | ACAGACCTCTTTTGCTCACT    |
| 9         | <i>CaCAT2-F</i>     | GAAGCCAAATCCTAAGTCCC    |
| 10        | <i>CaCAT2-R</i>     | CCAACCTCGGATTGCCTCTT    |
| 11        | <i>CaAPX1-F</i>     | AGAGGACAAGCCAGAACCAC    |
| 12        | <i>CaAPX1-R</i>     | CCTTGTCTGATGGCAACTGT    |

|    |                  |                         |
|----|------------------|-------------------------|
| 13 | <i>ERD15-F</i>   | CCAGCGAAATGGGGAAAC      |
| 14 | <i>ERD15-R</i>   | ACAAAGGTACAGTGGTGGC     |
| 15 | <i>CaCBF1A-F</i> | TGAGGCTGTCTGAGTCTTTC    |
| 16 | <i>CaCBF1A-R</i> | AGGTGGAGGTAGCGTTAGT     |
| 17 | <i>AtActin-F</i> | TGTTATGGTAGGGATGGGTC    |
| 18 | <i>AtActin-R</i> | TTCTCTCTATTTGCCTTGGG    |
| 19 | <i>AtCAT2-F</i>  | GCAACTACCCCGAGTGGAAA    |
| 20 | <i>AtCAT2-R</i>  | TGTTTCAGAACCAAGCGACCA   |
| 21 | <i>AtPOD-F</i>   | TCCGGGAGCCACACCATTGG    |
| 22 | <i>AtPOD-R</i>   | TGGTCGGAATTCAACAG       |
| 23 | <i>AtSOD-F</i>   | ATGAGAAGTTCTATGAAGAG    |
| 24 | <i>AtSOD-R</i>   | GTCTTTATGTAATCTGGT      |
| 25 | <i>AtRD29A-F</i> | AACCACCACTCAACACACAC    |
| 26 | <i>AtRD29A-R</i> | AGTCGCACCATTCTCATGATG   |
| 27 | <i>AtKIN1-F</i>  | GCGAAAGATCAAACCTCCCA    |
| 28 | <i>AtKIN1-R</i>  | TCCTTCTGTGTGTTTGGAAGA   |
| 29 | <i>AtCBF1-F</i>  | GTTTGGGATGCCGACTTTGTTGG |
| 30 | <i>AtCBF1-R</i>  | GTCACCATCTCCTTCGCCGTCAT |

**Table S2.** List of the 10 proteins selected following the Y1H screening.

| Numbering | Gene ID                                                                                              | GenBank Accession     |
|-----------|------------------------------------------------------------------------------------------------------|-----------------------|
| 1         | Capsicum annuum transcription factor MYC2-like (LOC107870881), mRNA                                  | XM_016717573.1        |
| 2         | Capsicum annuum ferredoxin-dependent glutamate synthase, chloroplastic (LOC107852264), mRNA          | NM_001324694.1        |
| 3         | Capsicum annuum transcription factor BIM1 (LOC107862352), transcript variant X2, mRNA                | XM_016707907.1        |
| 4         | <b>Capsicum annuum transcription factor bHLH79 (LOC107862470), mRNA</b>                              | <b>XM_016708062.1</b> |
| 5         | Capsicum annuum FGGY carbohydrate kinase domain-containing protein (LOC107877499), mRNA              | XM_016724156.1        |
| 6         | Capsicum annuum abscisic acid 8'-hydroxylase 1-like (LOC107850059), mRNA                             | XM_016694530.1        |
| 7         | Capsicum annuum uncharacterized LOC107867496(LOC107867496), mRNA                                     | XM_016713756.1        |
| 8         | Capsicum annuum protein BRASSINAZOLE-RESISTANT 1-like (LOC107867043), mRNA                           | XM_016713134.1        |
| 9         | Capsicum annuum phosphatidylinositol:ceramide inositolphosphotransferase 2-like (LOC107842870), mRNA | XM_016686913.1        |
| 10        | Capsicum annuum transcription factor MYC2-like (LOC107850747), mRNA                                  | XM_016695492.1        |
